# Supplementary material for: Identification of a novel autophagy signature for predicting survival in patients with lung adenocarcinoma
Source: PeerJ journal article supplement (doi:10.7717/peerj.11074), 2021-04-21

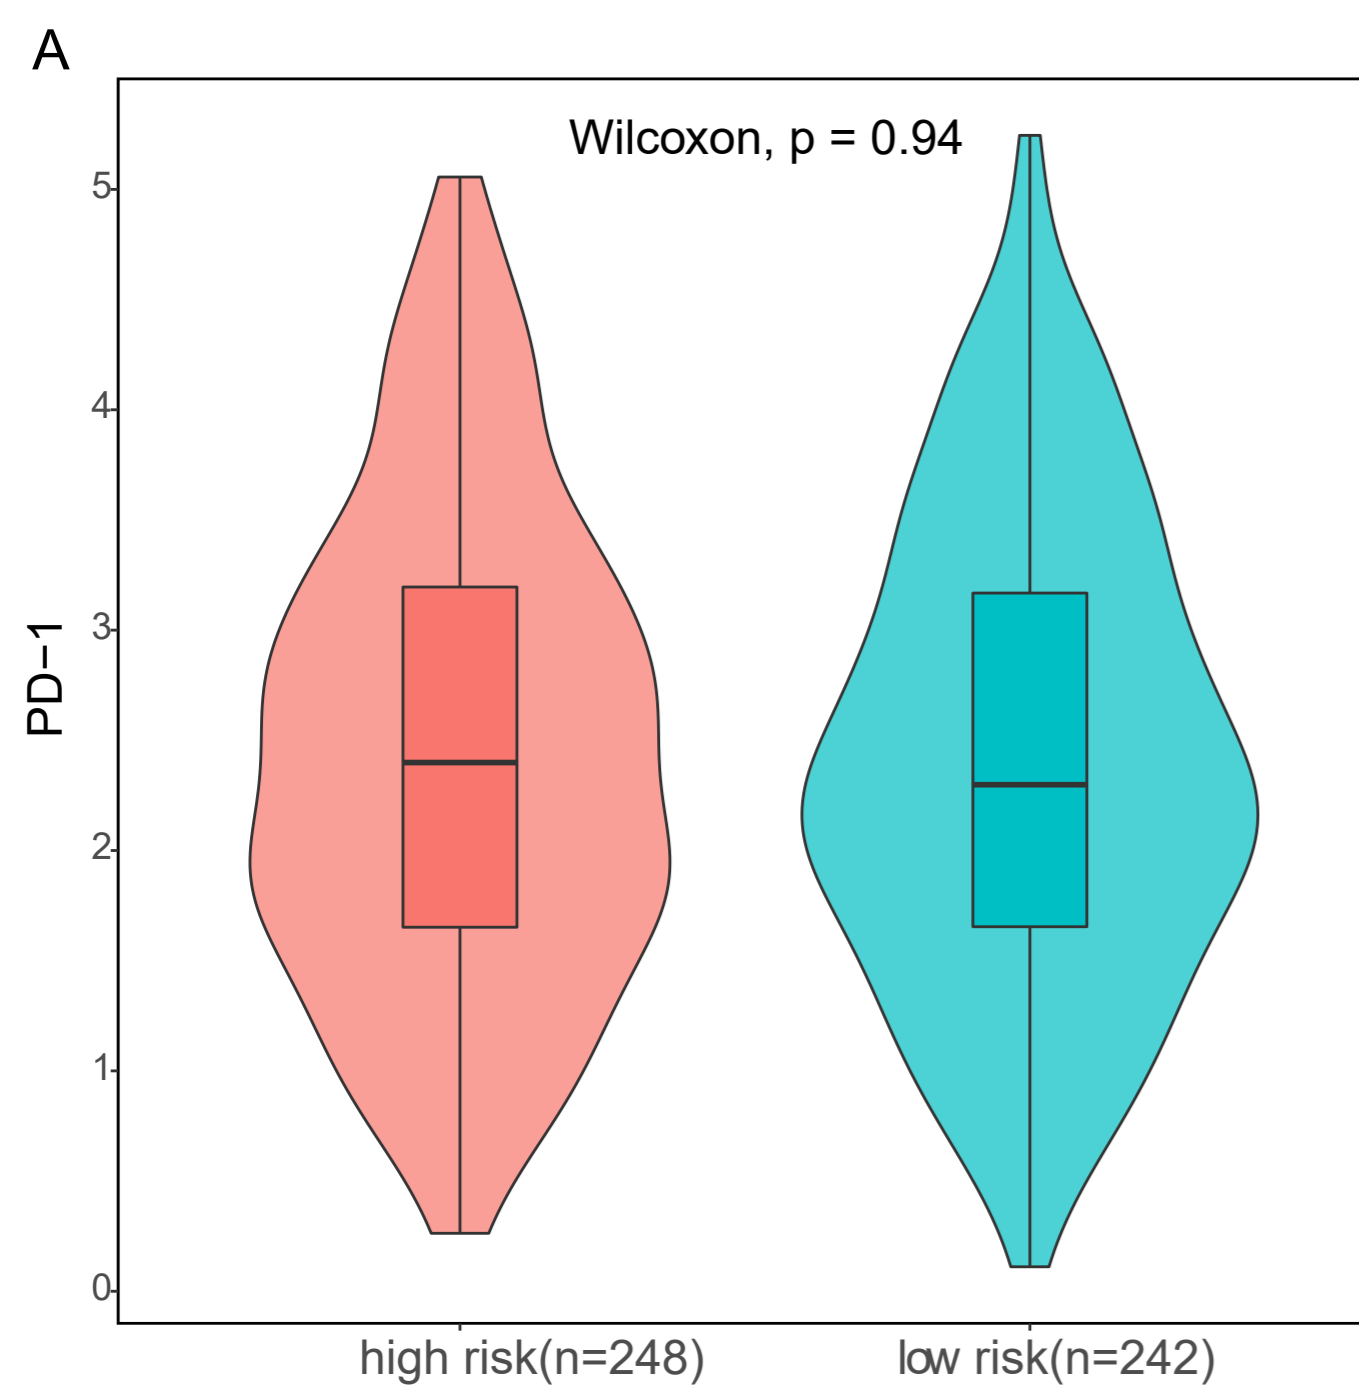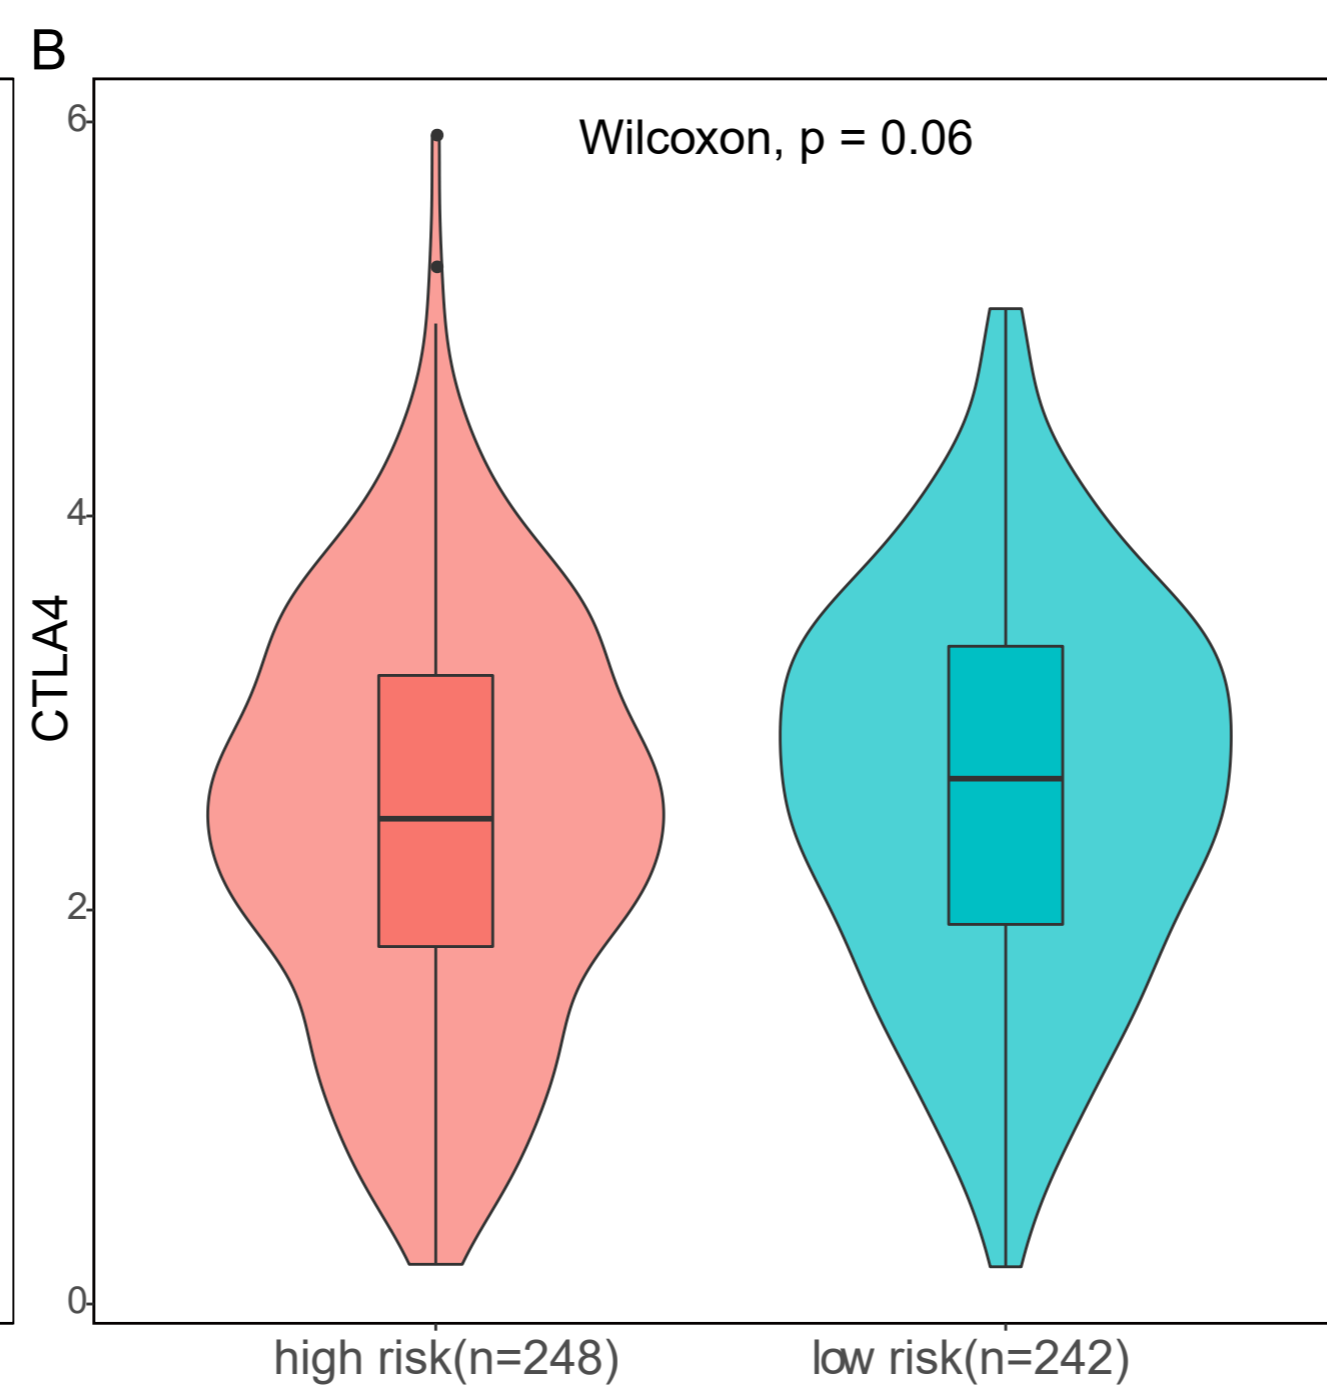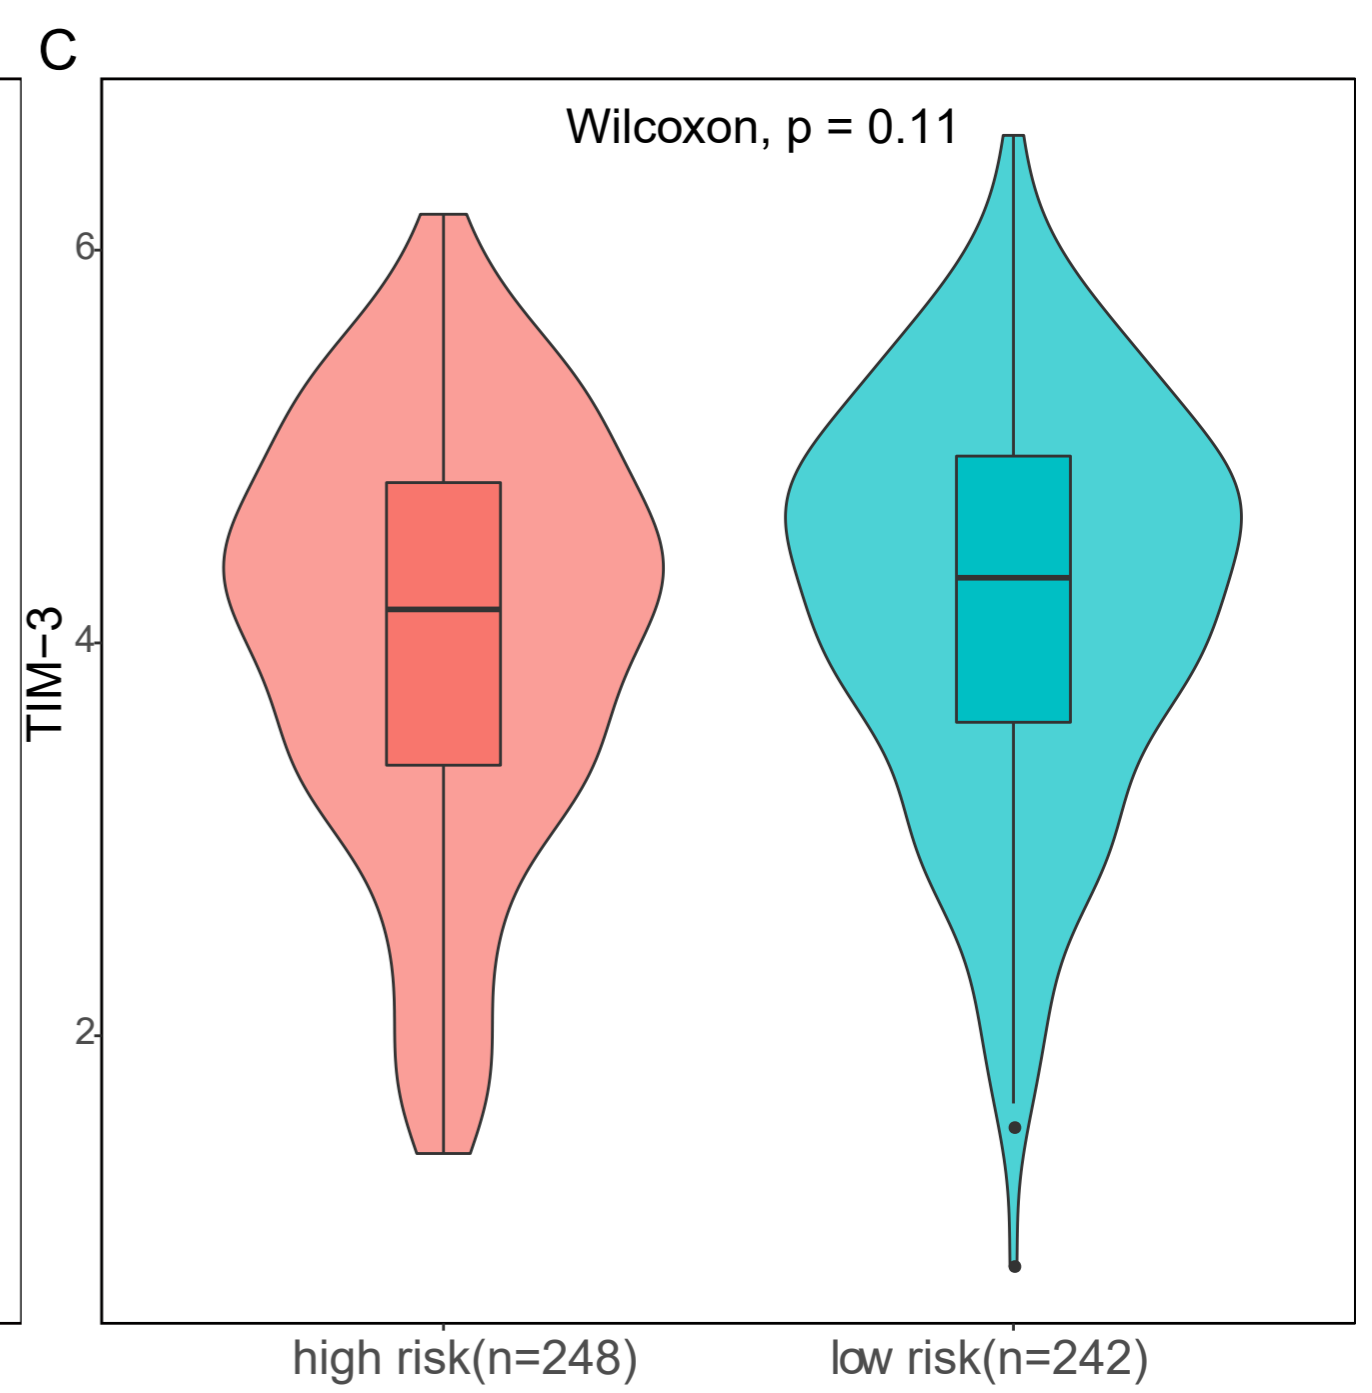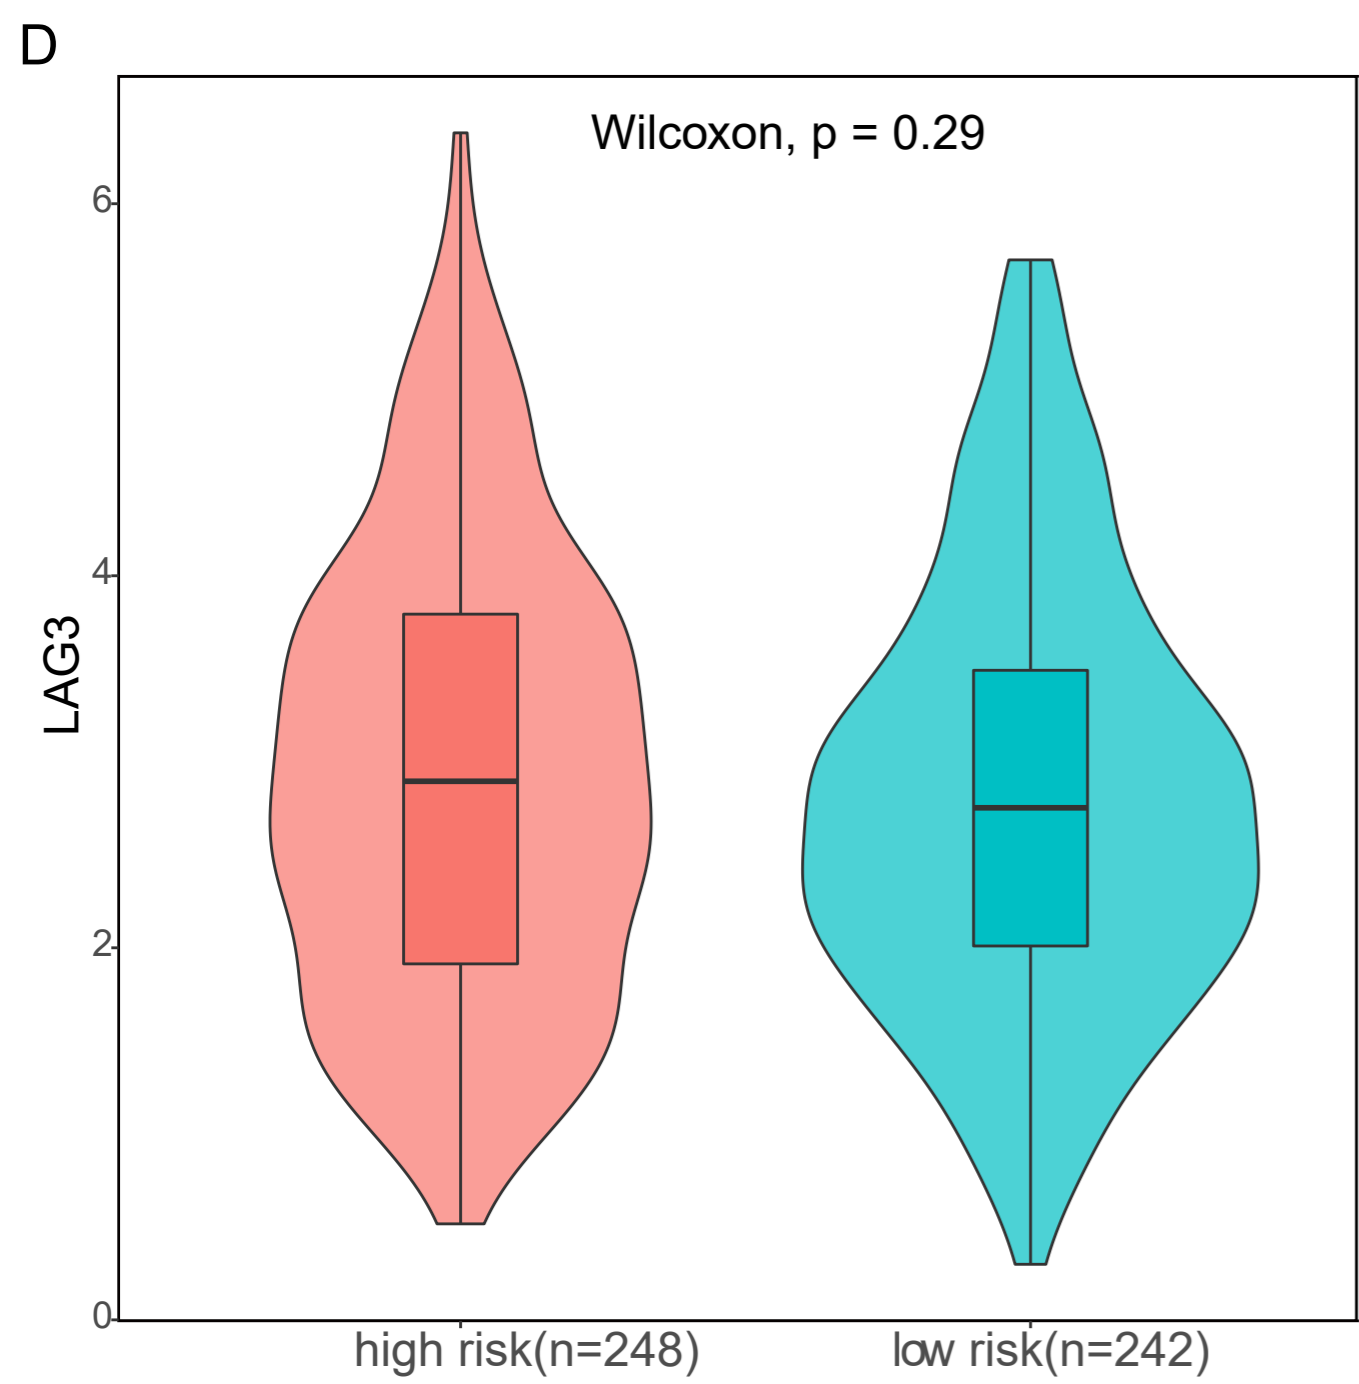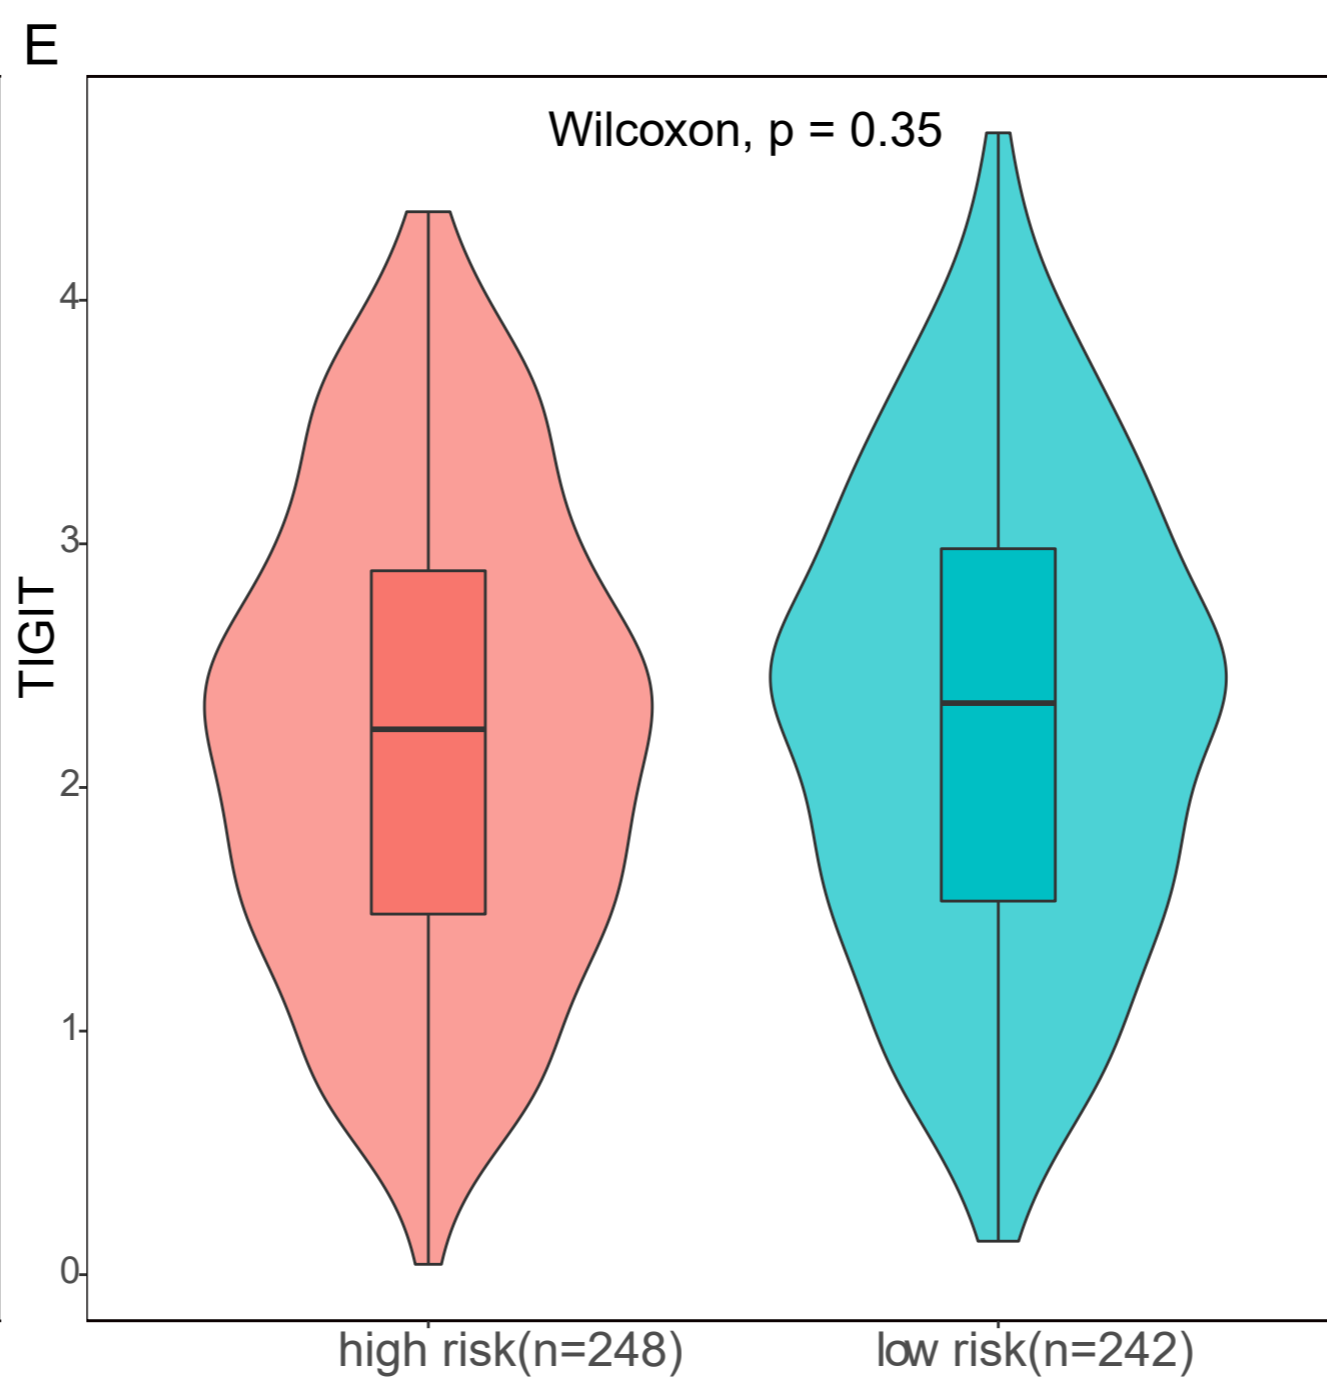

Supplement: supplemental_figure_1.pdf [file supplemental_figure_1.pdf]
